# Supplementary material
Source: Springer Nature journal article supplement (https://www.springermedizin.de/resource/supplementary/12872_2007_184_MOESM1_ESM.pdf/9431272)

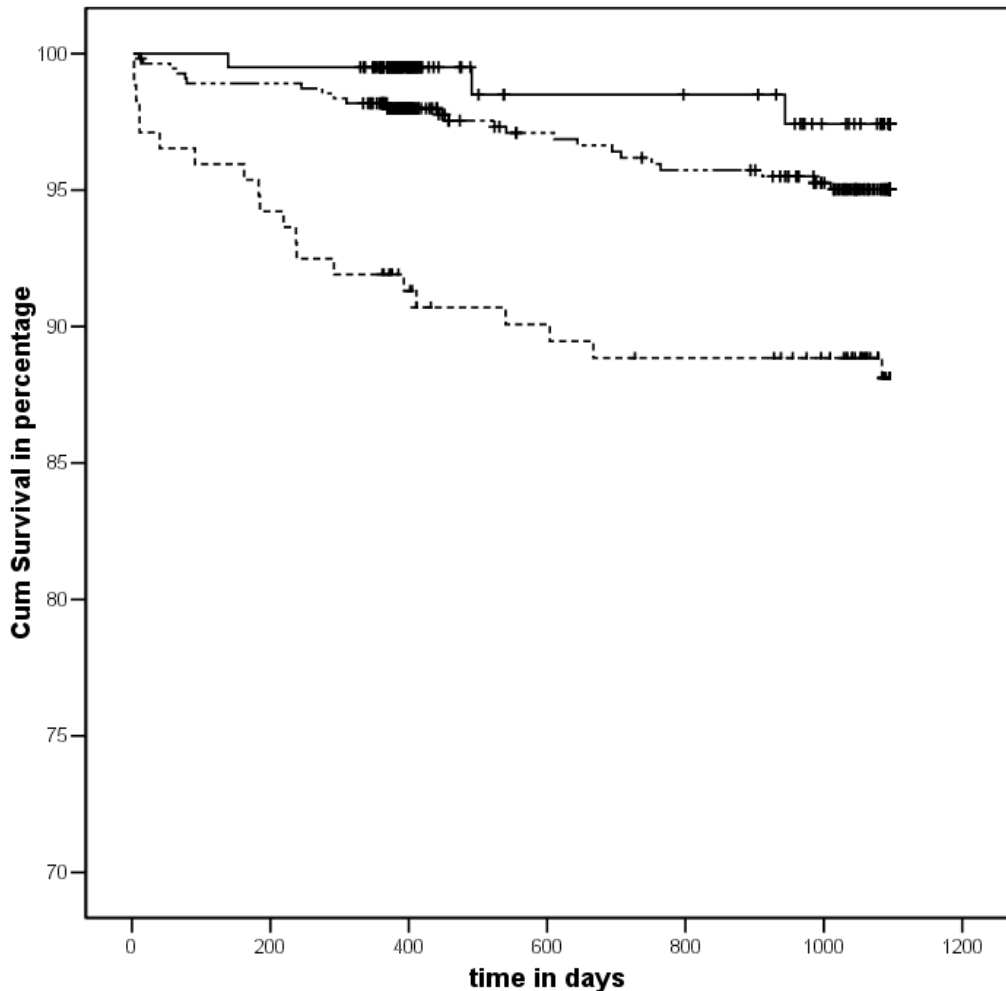

- LVEF > 55 % (n = 200)
- · - LVEF between 35 % and 55 % (n = 551)
- - - LVEF < 35 % (n = 173)

Supplement: MOESM1 [file 9431272]
